# Supplementary material for: Catalytic Selective Oxidation of β-O-4 Bond in Phenethoxybenzene as a Lignin Model Using (TBA)5[PMo10V2O40] Nanocatalyst: Optimization of Operational Conditions
Source: MDPI journal article supplement (doi:10.3390/molecules28176368), 2023-08-31

## Supplementary Material

# Catalytic Selective Oxidation of $\beta$ -O-4 Bond in Phenethoxybenzene as a Lignin Model Using (TBA)<sub>5</sub>[PMo<sub>10</sub>V<sub>2</sub>O<sub>40</sub>] Nanocatalyst: Optimization of Operational Conditions

Juan Díaz <sup>1,2</sup>, Luis R. Pizzio <sup>3</sup>, Gina Pecchi <sup>1,2</sup>, Cristian H. Campos <sup>1</sup>, Laura Azócar <sup>4</sup>, Rodrigo Briones <sup>5</sup>, Romina Romero <sup>1</sup>, Eduardo Troncoso <sup>1,2</sup>, Camila Méndez-Rivas <sup>1</sup>, Victoria Melín <sup>1</sup>, Juan C. Murillo-Sierra <sup>1</sup> and David Contreras <sup>1,2,\*</sup>

<sup>1</sup> Facultad de Ciencias Químicas, Universidad de Concepción, Concepción 4070386, Chile

<sup>2</sup> ANID—Millennium Science Initiative Program—Millennium Nuclei on Catalytic Process towards Sustainable Chemistry (CSC), Santiago 8970117, Chile

<sup>3</sup> Centro de Investigación y Desarrollo en Ciencias Aplicadas Dr. Jorge J. Ronco, Universidad de La Plata, La Plata B1900AJK, Argentina

<sup>4</sup> Centro de Energía, Departamento de Química Ambiental, Facultad de Ciencias, Universidad Católica de la Santísima Concepción, Concepción 4090541, Chile

<sup>5</sup> Centro de Investigación de Polímeros Avanzados (CIPA), Concepción 4051381, Chile

\* Correspondence: dcontrer@udec.cl

**Table S1.** Analysis of variance (ANOVA) for experimental results of fractional factorial screening design to obtain the statistically significant variables in the conversion of phenethoxybenzene.

| Source         | Sum of squares | Df. ** | Mean squares | F-value | P-value |
|----------------|----------------|--------|--------------|---------|---------|
| Model          | 55.6           | 4      | 13.91        | 59.67   | 0.001*  |
| Residual Error | 0.93           | 4      | 0.23         | -       | -       |

|                    |       |   |      |      |       |
|--------------------|-------|---|------|------|-------|
| Lack of fit        | 0.68  | 2 | 0.34 | 2.78 | 0.265 |
| Pure Error         | 0.25  | 2 | 0.12 | -    | -     |
| Total              | 56.53 | 8 | -    | -    | -     |
| $R^2 = 0.984$      |       |   |      |      |       |
| Adj. $R^2 = 0.967$ |       |   |      |      |       |

---

\* Significant at 95% confidence level; \*\* Degrees of freedom

**Table S2.** Analysis of variance (ANOVA) for the quadratic polynomial model.

| Source             | Sum of squares | Df. ** | Mean squares | F-value | P-value |
|--------------------|----------------|--------|--------------|---------|---------|
| Model              | 236.1          | 9      | 26.2         | 10.16   | 0.010*  |
| Residual Error     | 12.9           | 5      | 2.58         | -       | -       |
| Lack of fit        | 8.98           | 3      | 2.99         | 1.524   | 0.420   |
| Pure Error         | 3.93           | 2      | 1.96         | -       | -       |
| Total              | 249.0          | 14     | -            | -       | -       |
| $R^2 = 0.948$      |                |        |              |         |         |
| Adj. $R^2 = 0.855$ |                |        |              |         |         |

\* Significant at 95% confidence level; \*\* Degrees of freedom.

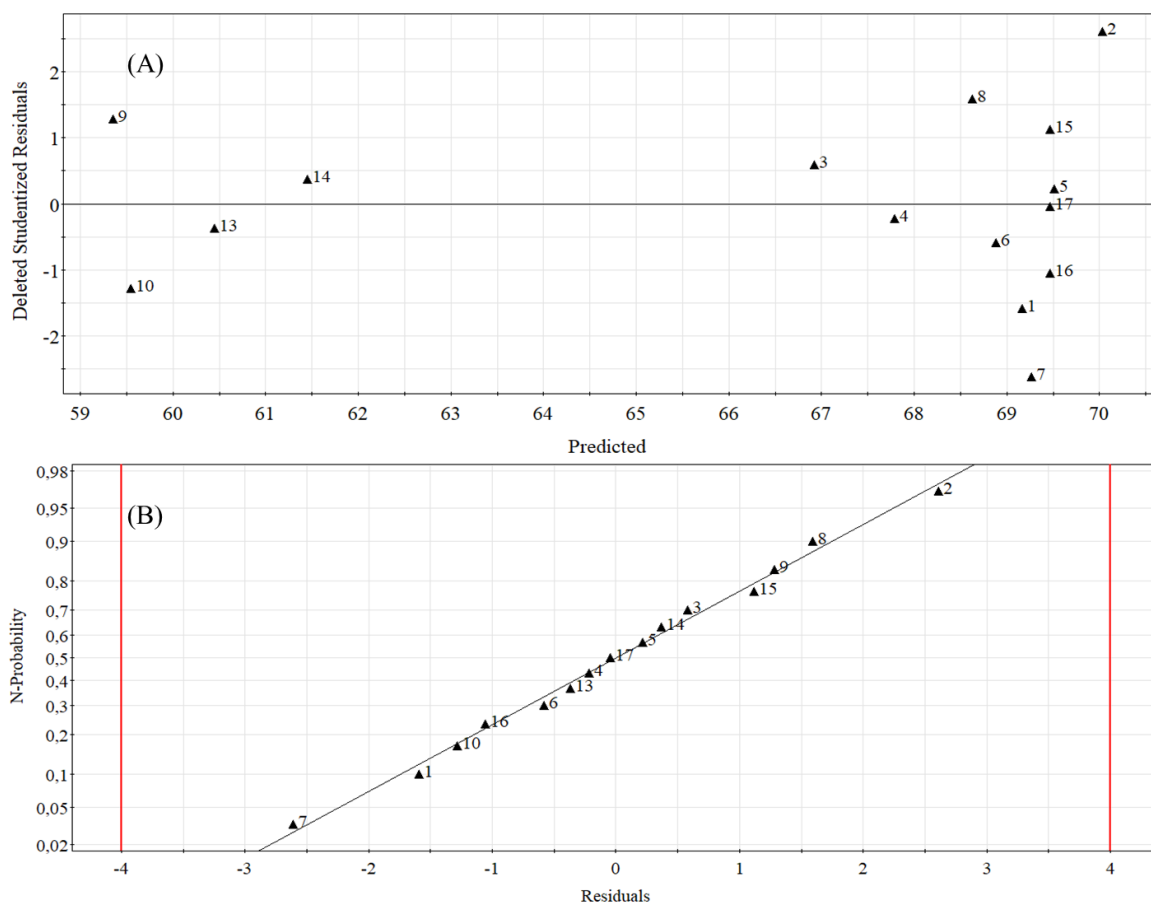

**Figure S1.** (A) Residuals *versus* predicted values y (B) Normal probability of the residuals.

**Table S3.** Identification of catalytic Kraft lignin depolymerization products by GC-MS.

| Peak number | Compound name                              | Retention time [min] | Structure |
|-------------|--------------------------------------------|----------------------|-----------|
| 1           | 1,1,3-Trimethoxypropane                    | 5.8                  |           |
| 2           | Dimethyl malonate                          | 6.3                  |           |
| 3           | 2-Butenedioic acid (Z)-, dimethyl ester    | 7.6                  |           |
| 4           | 2-Butanedioic acid dimethyl ester          | 7.7                  |           |
| 5           | Benzoic acid, methyl ester                 | 8.5                  |           |
| 6           | 2-Isopropoxypropanol                       | 8.9                  |           |
| 7           | Butanedioic acid, methoxy-, dimethyl ester | 9.1                  |           |
| 8           | Tributylamine                              | 9.8                  |           |

|    |                                                               |      |                                                                                       |
|----|---------------------------------------------------------------|------|---------------------------------------------------------------------------------------|
| 9  | Trimethyl ethane-1,1,2-tricarboxylate                         | 10.8 | 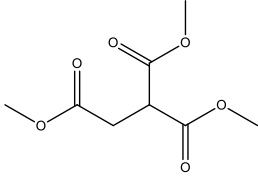   |
| 10 | (1E)-1-propene-1,2,3-tricarboxylic acid 1,2,3-trimethyl ester | 12.9 |    |
| 11 | <i>p</i> -hydroxybenzoic acid methyl ester                    | 13.3 |    |
| 12 | Methyl 4-hydroxy-3-methoxybenzoate                            | 14.9 |   |
| 13 | Methyl 3,4-dimethoxybenzoate                                  | 16.3 |  |
| 14 | 2-Propenoic acid, 3-(4-hydroxyphenyl)-, methyl ester          | 16.7 |  |
| 15 | Phenethoxybenzene                                             | 17.7 |  |
| 16 | Methyl 3-formyl-2,4-dihydroxy-6-methylbenzoate                | 18.6 |  |

17 Trimethyl 1,2,4-  
benzenetricarboxylate

19.5

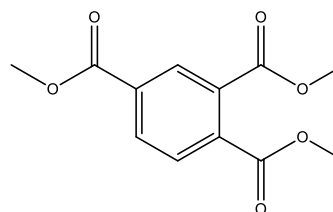

18 1-(2,4,6-  
trimethoxyphenyl)-2-  
propene

19.9

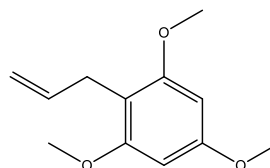

19 Dimethyl 5-aminobenzene-  
1,3-dicarboxylate

20.1

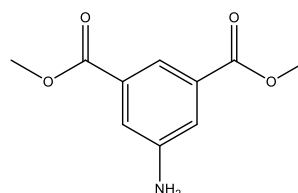

20 4H-Benzo[def]naphtho[2,3-  
b]carbazole

23.6

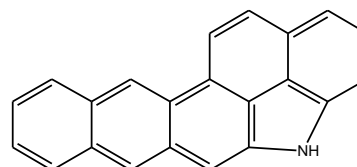

Supplement: s1 [file s1]
